# Supplementary material
Source: MDPI journal article supplement (https://www.mdpi.com/2036-7422/11/2/8)
Supplement: s1 [file s1]

Supplementary Materials

# Inflammatory bowel diseases and coexisting spondyloarthritis: a neglected and too often under-reported association by radiologists. A multicenter study by Italian Research Group of Imaging in Reumatology

**Table S1.** CT and MRI scanners and MRI sequences employed for CTE and MRE in each different centre.

| Centre         | Readers       | Patients (n°) | Patients Sex   | MRI Scanner                                                                        | MRI Protocol                                                                                                                                                                                                                                                                                                                                                                                                                                                                                                                                                                                                                                                                                                                                                                                                                    | CT Scanner                                                                                        |
|----------------|---------------|---------------|----------------|------------------------------------------------------------------------------------|---------------------------------------------------------------------------------------------------------------------------------------------------------------------------------------------------------------------------------------------------------------------------------------------------------------------------------------------------------------------------------------------------------------------------------------------------------------------------------------------------------------------------------------------------------------------------------------------------------------------------------------------------------------------------------------------------------------------------------------------------------------------------------------------------------------------------------|---------------------------------------------------------------------------------------------------|
| <i>Siena</i>   | F.G.,<br>M.M. | 288           | 121 M<br>167 F | 1.5-T MR Scanner<br>(Signa Twin Speed Hdx;<br>General Electric Healthcare,<br>USA) | <ul style="list-style-type: none"> <li>- TrueFISP-steady state free precession balanced (b-SSFP) in axial and coronal planes,</li> <li>- single shot fast spin echo breath old (SSFSE BH)</li> <li>- ASSET T2w in coronal plane,</li> <li>- fast spoiled gradient-echo (FSPGR) FatSat breath old</li> <li>- ASSET T1W in axial plane,</li> <li>- LAVA-XV mask plus 3 post-contrast phases in coronal plane.</li> <li>- Steady state free precession, in axial an coronal planes,</li> <li>- Single shot FSE fat-sat, in axial and coronal planes,</li> <li>- Contrast 3D spoiled GE, in axial and coronal planes,</li> <li>- DWI using 3 different b values (0, 100,800) in axial plane,</li> <li>- Thick slab HASTE-sequence in coronal plane,</li> <li>- Steady state free precession, in axial an coronal planes.</li> </ul> | 64-detector row CT scanner (Discovery 750 HD,<br>GE Healthcare, Milwaukee, WI, USA)               |
| <i>Palermo</i> | G.R.,<br>A.V. | 175           | 77 M<br>98 F   | 1.5-T MR Scanner<br>(Philips Medical System,<br>Eindhoven, The Netherlands)        | <ul style="list-style-type: none"> <li>- FIESTA-steady state free precession (SSFP) in axial and coronal places,</li> </ul>                                                                                                                                                                                                                                                                                                                                                                                                                                                                                                                                                                                                                                                                                                     | 128-detector row CT scanner<br>(Somatom Definition, Siemens, Germany)                             |
| <i>Ancona</i>  | M.C.,<br>A.G. | 128           | 71 M<br>57 F   | 1.5-T MR Scanner<br>(Cvi/Nvi)<br>Excite HDxy 15.0                                  | <ul style="list-style-type: none"> <li>- FIESTA-steady state free precession (SSFP) in axial and coronal places,</li> </ul>                                                                                                                                                                                                                                                                                                                                                                                                                                                                                                                                                                                                                                                                                                     | 64-detector row CT scanner<br>(ligh Speed VCT power scanner GE<br>Healthcare, Milwaukee, WI, USA) |

|                    |               |     |              |                                                                                                        |                                                                                                                                                                                                                                                                                                                                                                                                                                                                                                                                                                                                                                                                                                                                                                                                                                                                                                                             |                                                                                                                           |
|--------------------|---------------|-----|--------------|--------------------------------------------------------------------------------------------------------|-----------------------------------------------------------------------------------------------------------------------------------------------------------------------------------------------------------------------------------------------------------------------------------------------------------------------------------------------------------------------------------------------------------------------------------------------------------------------------------------------------------------------------------------------------------------------------------------------------------------------------------------------------------------------------------------------------------------------------------------------------------------------------------------------------------------------------------------------------------------------------------------------------------------------------|---------------------------------------------------------------------------------------------------------------------------|
|                    |               |     |              | General Electric<br>Healthcare, Milwaukee, WI,<br>USA                                                  | <ul style="list-style-type: none"> <li>- Single shot fast spin echo (FSE) T2-w sequence in coronal and sagittal planes,</li> <li>- T2-w fat sat in axial plane,</li> <li>- Pre-contrast LAVA 3D gradient T1-w fat sat sequence in axial and coronal planes,</li> <li>- Post-contrast LAVA gradient T1-w fat sat sequence in axial, coronal and sagittal.</li> <li>- TrueFISP-steady state T2w in coronal and axial planes,</li> <li>- 3D TrueFISP -steady state T2w in coronal plane,</li> <li>- Half Fourier single shot Turbo spin eco (HASTE) fat suppressed T2w in coronal and axial planes,</li> <li>- Diffusion weight imaging (DWI), (B=0,500,1000),</li> <li>- Pre-contrast coronal and post-contrast coronal and axial 3D Cine TrueFISP fat suppressed GRE T1w (VIBE).</li> <li>- TrueFISP b-SSFP in axial and coronal planes,</li> <li>- RARE- single shot turbo spin echo (TSE) T2w in coronal plane,</li> </ul> |                                                                                                                           |
| <i>Siracusa</i>    | F.I.,<br>G.C. | 100 | 51 M<br>49 F | 1.5-T MR Scanner<br>(Siemens Avanto, Germany)                                                          | <ul style="list-style-type: none"> <li>- Half Fourier Acquisition Turbo Spin Eco (HASTE) T2w in axial plane,</li> <li>- Post-contrast coronal 3D spoiled gradient-recalled echo T1w sequence (VIBE) with SPECTral inversion at lipid.</li> <li>- FIESTA b-SSFP in axial and coronal planes,</li> <li>- Fast spin echo (FSE) T1w sequence in axial and coronal planes,</li> <li>- FSE T2w sequence in axial and coronal planes,</li> <li>- FSE T2w sequence in axial plane,</li> <li>- Post-contrast 3D spoiled gradient-recalled echo T1w sequence in axial and coronal planes.</li> <li>- Single shot spin echo (sSSH) T2w in coronal and axial planes; - b-fast field echo 2D (BFFE_M2D) T2w in coronal plane,</li> <li>- Balanced turbo field echo (BTFE_SPAIR),</li> </ul>                                                                                                                                              | 64-detector row CT Scanner<br>(Siemens Somatom, Germany)                                                                  |
| <i>Napoli</i>      | A.R.,<br>G.V. | 75  | 41 M<br>34 F | 1.5-T MR Scanner<br>(Siemens Symphony, Germany)                                                        | <ul style="list-style-type: none"> <li>- Half Fourier Acquisition Turbo Spin Eco (HASTE) T2w in axial plane,</li> <li>- Post-contrast coronal 3D spoiled gradient-recalled echo T1w sequence (VIBE) with SPECTral inversion at lipid.</li> <li>- FIESTA b-SSFP in axial and coronal planes,</li> <li>- Fast spin echo (FSE) T1w sequence in axial and coronal planes,</li> <li>- FSE T2w sequence in axial and coronal planes,</li> <li>- FSE T2w sequence in axial plane,</li> <li>- Post-contrast 3D spoiled gradient-recalled echo T1w sequence in axial and coronal planes.</li> <li>- Single shot spin echo (sSSH) T2w in coronal and axial planes; - b-fast field echo 2D (BFFE_M2D) T2w in coronal plane,</li> <li>- Balanced turbo field echo (BTFE_SPAIR),</li> </ul>                                                                                                                                              | 4-detector row CT scanner<br>(Toshiba, Aquilion, Toshiba Medical System Europe BV Zoetermeer, The Netherlands)            |
| <i>L'Aquila</i>    | A.B.,<br>F.B. | 65  | 38 M<br>27 F | 1.5-T MR Scanner<br>(Signa Horizon; General Electric Healthcare, Milwaukee, WI USA)                    | <ul style="list-style-type: none"> <li>- Half Fourier Acquisition Turbo Spin Eco (HASTE) T2w in axial plane,</li> <li>- Post-contrast coronal 3D spoiled gradient-recalled echo T1w sequence (VIBE) with SPECTral inversion at lipid.</li> <li>- FIESTA b-SSFP in axial and coronal planes,</li> <li>- Fast spin echo (FSE) T1w sequence in axial and coronal planes,</li> <li>- FSE T2w sequence in axial and coronal planes,</li> <li>- FSE T2w sequence in axial plane,</li> <li>- Post-contrast 3D spoiled gradient-recalled echo T1w sequence in axial and coronal planes.</li> <li>- Single shot spin echo (sSSH) T2w in coronal and axial planes; - b-fast field echo 2D (BFFE_M2D) T2w in coronal plane,</li> <li>- Balanced turbo field echo (BTFE_SPAIR),</li> </ul>                                                                                                                                              | 320-detector row CT scanner<br>(Toshiba, Aquilion One, Canon Medical Systems, USA)                                        |
| <i>Alessandria</i> | E.L.,<br>J.Z. | 40  | 18 M<br>22 F | 1.5-T MR Scanner<br>(Philips Ingenia, Philips Healthcare/Medical System BV Eindhoven, The Netherlands) | <ul style="list-style-type: none"> <li>- Half Fourier Acquisition Turbo Spin Eco (HASTE) T2w in axial plane,</li> <li>- Post-contrast coronal 3D spoiled gradient-recalled echo T1w sequence (VIBE) with SPECTral inversion at lipid.</li> <li>- FIESTA b-SSFP in axial and coronal planes,</li> <li>- Fast spin echo (FSE) T1w sequence in axial and coronal planes,</li> <li>- FSE T2w sequence in axial and coronal planes,</li> <li>- FSE T2w sequence in axial plane,</li> <li>- Post-contrast 3D spoiled gradient-recalled echo T1w sequence in axial and coronal planes.</li> <li>- Single shot spin echo (sSSH) T2w in coronal and axial planes; - b-fast field echo 2D (BFFE_M2D) T2w in coronal plane,</li> <li>- Balanced turbo field echo (BTFE_SPAIR),</li> </ul>                                                                                                                                              | 2x320-detector row CT scanner<br>(Toshiba Aquilion One 640, Toshiba Medical System Europe BV Zoetermeer, The Netherlands) |

|                   |              |    |              |                                                                             |                                                                                                                                                                                                                                                                  |                                                                               |
|-------------------|--------------|----|--------------|-----------------------------------------------------------------------------|------------------------------------------------------------------------------------------------------------------------------------------------------------------------------------------------------------------------------------------------------------------|-------------------------------------------------------------------------------|
| <i>Campobasso</i> | N.M,<br>L.B. | 23 | 12 M<br>11 F | 1.5-T MR Scanner<br>(ACHIEVA D-STEAM 1.5<br>Philips, Best, The Netherlands) | - Dynamic enhanced T1w high resolution isotropic volume examination in axial and coronal planes,<br>- Pre- and post-contrast, with Spectral inversion at lipid (THRIVE, Philips).<br>- Steady state free precession balanced (BFFE) in axial and coronal planes, | 64-detector row CT scanner<br>(Brilliance 64, Philips, Best, The Netherlands) |
|                   |              |    |              |                                                                             | - Single shot FSE T2w in coronal plane,<br>- Post-contrast coronal 3D spoiled gradient-recalled echo T1w with Thirve,<br>- Diffusion weighted imaging with background body signal suppression (DWIBS).                                                           |                                                                               |

**Publisher's Note:** MDPI stays neutral with regard to jurisdictional claims in published maps and institutional affiliations.

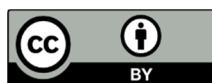

© 2020 by the authors. Submitted for possible open access publication under the terms and conditions of the Creative Commons Attribution (CC BY) license (<http://creativecommons.org/licenses/by/4.0/>).
